# Supplementary material
Source: publisher site journal article supplement (https://www.dovepress.com/get_supplementary_file.php?f=285359-1.docx)
Supplement: Supplementary file 1 [file get_supplementary_file.php]

# **Supplementary file 1:** Search strategies

**Medline**

| **Search Number** | **Query** | **Results** |
| --- | --- | --- |
| #1 | exp “costs and cost analysis” or costs.tw. or cost effective:.tw. or cost:.mp. or cost benefit analys:.mp. or health care costs.mp. | 569395 |
| #2 | Saudi Arabia or KSA or United Arab Emirates or UAE or Qatar or Kuwait or Oman or Bahrain or Gulf Cooperation Council or GCC | 26933 |
| #3 | 1 and 2 | 719 |
| #4 | limit 3 to yr=“2009 -2019” and English | 428 |

**Scopus**

| **Search Number** | **Query** | **Results** |
| --- | --- | --- |
| #1 | TITLE-ABS-KEY ( ”cost benefit”  OR  ”cost effectiveness”  OR  ”cost utility”  OR  ”cost minimization”  OR  ”economic evaluation” )AND  ( LIMIT-TO ( AFFILCOUNTRY ,  ”Saudi Arabia” )  OR  LIMIT-TO ( AFFILCOUNTRY ,  ”United Arab Emirates” )  OR  LIMIT-TO ( AFFILCOUNTRY ,  ”Qatar” )  OR  LIMIT-TO ( AFFILCOUNTRY ,  ”Kuwait” )  OR  LIMIT-TO ( AFFILCOUNTRY ,  ”Oman” )  OR  LIMIT-TO ( AFFILCOUNTRY ,  ”Bahrain” ) )  AND  ( LIMIT-TO ( SUBJAREA ,  ”MEDI” ) )  AND  ( LIMIT-TO ( PUBYEAR ,  2019 )  OR  LIMIT-TO ( PUBYEAR ,  2018 )  OR  LIMIT-TO ( PUBYEAR ,  2017 )  OR  LIMIT-TO ( PUBYEAR ,  2016 )  OR  LIMIT-TO ( PUBYEAR ,  2015 )  OR  LIMIT-TO ( PUBYEAR ,  2014 )  OR  LIMIT-TO ( PUBYEAR ,  2013 )  OR  LIMIT-TO ( PUBYEAR ,  2012 )  OR  LIMIT-TO ( PUBYEAR ,  2011 )  OR  LIMIT-TO ( PUBYEAR ,  2010 )  OR  LIMIT-TO ( PUBYEAR ,  2009 ) ) | 550 |

**EMBASE**

| **Search Number** | **Query** | **Results** |
| --- | --- | --- |
| #1 | cost.tw. OR costs.tw. | 680790 |
| #2 | (Saudi Arabia or KSA or United Arab Emirates or UAE or Qatar or Kuwait or Oman or Bahrain).ab. | 30371 |
| #3 | 1 and 2 | 1096 |
| #4 | limit 3 to yr=“2009 -2019” and English | 872 |

**NHS EED**

| **Search Number** | **Query** | **Results** |
| --- | --- | --- |
| #1 | (cost OR economic ) AND (Saudi Arabia or KSA or United Arab Emirates or UAE or Qatar or Kuwait or Oman or Bahrain) AND (model) IN NHSEED FROM 2009 TO 2019 | 7 |
